## Prevalence and prognostic implications of moderate or severe mitral regurgitation in patients with bicuspid aortic valve

S.C. Butcher<sup>1</sup>, F. Prevedello<sup>1</sup>, W.K.F. Kong<sup>2</sup>, A.C.T. Ng<sup>3</sup>, K.K. Poh<sup>4</sup>, M. Shanks<sup>5</sup>, B.A. Popescu<sup>6</sup>, M. Fijalkowski<sup>7</sup>, J.B. Selvanayagam<sup>8</sup>, F. Pinto<sup>9</sup>, J.L. Zamorano<sup>10</sup>, P. Pibarot<sup>11</sup>, A. Evangelista<sup>12</sup>, J.J. Bax<sup>1</sup>, V. Delgado<sup>1</sup>

<sup>1</sup>Leiden University Medical Center, Department of Cardiology, Leiden, Netherlands (The); <sup>2</sup>National University Heart Centre, Department of Cardiology, Singapore, Singapore; <sup>3</sup>Princess Alexandra Hospital, Department of Cardiology, Brisbane, Australia; <sup>4</sup>National University of Singapore, Yong Loo Lin School of Medicine, Singapore, Singapore; <sup>5</sup>Mazankowski Alberta Heart Institute, Division of Cardiology, Edmonton, Canada; <sup>6</sup>University of Medicine and Pharmacy Carol Davila, Eurocolab, Institute for Cardiovascular Diseases “Prof. Dr. C. C. Iliescu”, Bucharest, Romania; <sup>7</sup>Medical University of Gdansk, First Department of Cardiology, Gdansk, Poland; <sup>8</sup>Flinders Medical Centre and Flinders University, Department of Cardiovascular Medicine, Adelaide, Australia; <sup>9</sup>Santa Maria University Hospital CHLN Lisbon Academic Medical Centre, Cardiology Department, Lisbon, Portugal; <sup>10</sup>Hospital Ramon y Cajal, Department of Cardiology, Madrid, Spain; <sup>11</sup>Quebec Heart and Lung Institute, Quebec, Canada; <sup>12</sup>University Hospital Vall d’Hebron, Department of Cardiology, Barcelona, Spain

On behalf of The BAV international registry

**Funding Acknowledgement:** Type of funding sources: None.

**Background:** Significant ( $\geq$  moderate) mitral regurgitation (MR) could augment the hemodynamic effects of aortic valvular disease in patients with bicuspid aortic valve (BAV), imposing a greater hemodynamic burden on left ventricle and atrium, possibly culminating in a faster onset of left ventricular (LV) dilation and/or symptoms.

**Purpose:** To determine the prevalence and prognostic implications of significant MR in patients with BAV.

**Methods:** In this large, multicenter, international registry, a total of 2,932 patients ( $48 \pm 18$  years, 71% male) with BAV were identified. All patients were evaluated for the presence of significant primary or secondary MR by transthoracic echocardiography and were followed-up for the endpoint of all-cause mortality and a combined endpoint of all-cause mortality or aortic valve surgery.

**Results:** Overall, 147 patients (5.0%) had significant primary (1.5%) or

secondary (3.5%) MR. Significant MR was associated with all-cause mortality (HR 2.80, 95% CI 1.91 to 4.11,  $p < 0.001$ , Figure A) and reduced event-free survival (HR 1.97, 95% CI 1.58 to 2.46,  $p < 0.001$ ) on univariable analysis. However, MR was not associated with all-cause mortality (HR 1.33, 95% CI 0.85 to 2.07,  $p = 0.21$ , Figure B) or event-free survival (HR 1.10, 95% CI 0.85 to 1.42,  $p = 0.46$ ) after multivariable adjustment. Subgroup analyses demonstrated an independent association between significant MR and all-cause mortality for individuals with significant aortic regurgitation (HR 2.04, 95% CI 1.03 to 4.05,  $p = 0.042$ ), although this association was not observed for subgroups with significant aortic stenosis or without significant aortic valve dysfunction.

**Conclusions:** Significant MR is uncommon in patients with BAV. Following adjustment for confounding variables, significant MR was not associated with event-free or overall survival.

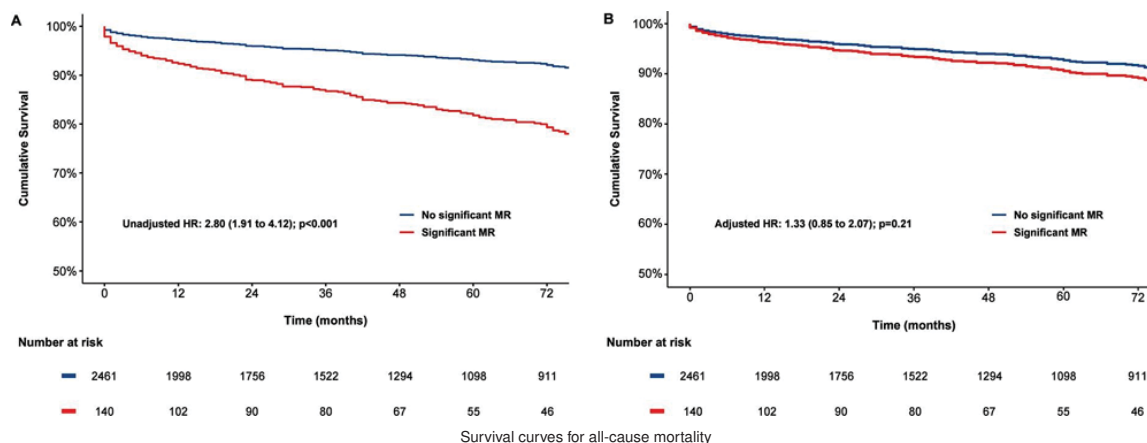

Source: http://academic.oup.com/eurheartj/article-pdf/42/Supplement_1/ehab724.1568/40592228/ehab724.1568.pdf
